# Supplementary material for: Angiogenic and inflammatory responses in human induced microglia-like (iMG) cells from patients with Moyamoya disease
Source: PubMed Central journal article supplement (PMC10491754; doi:10.1038/s41598-023-41456-z), 2023-09-08

**Figure S1**

qPCR

*RNF213*

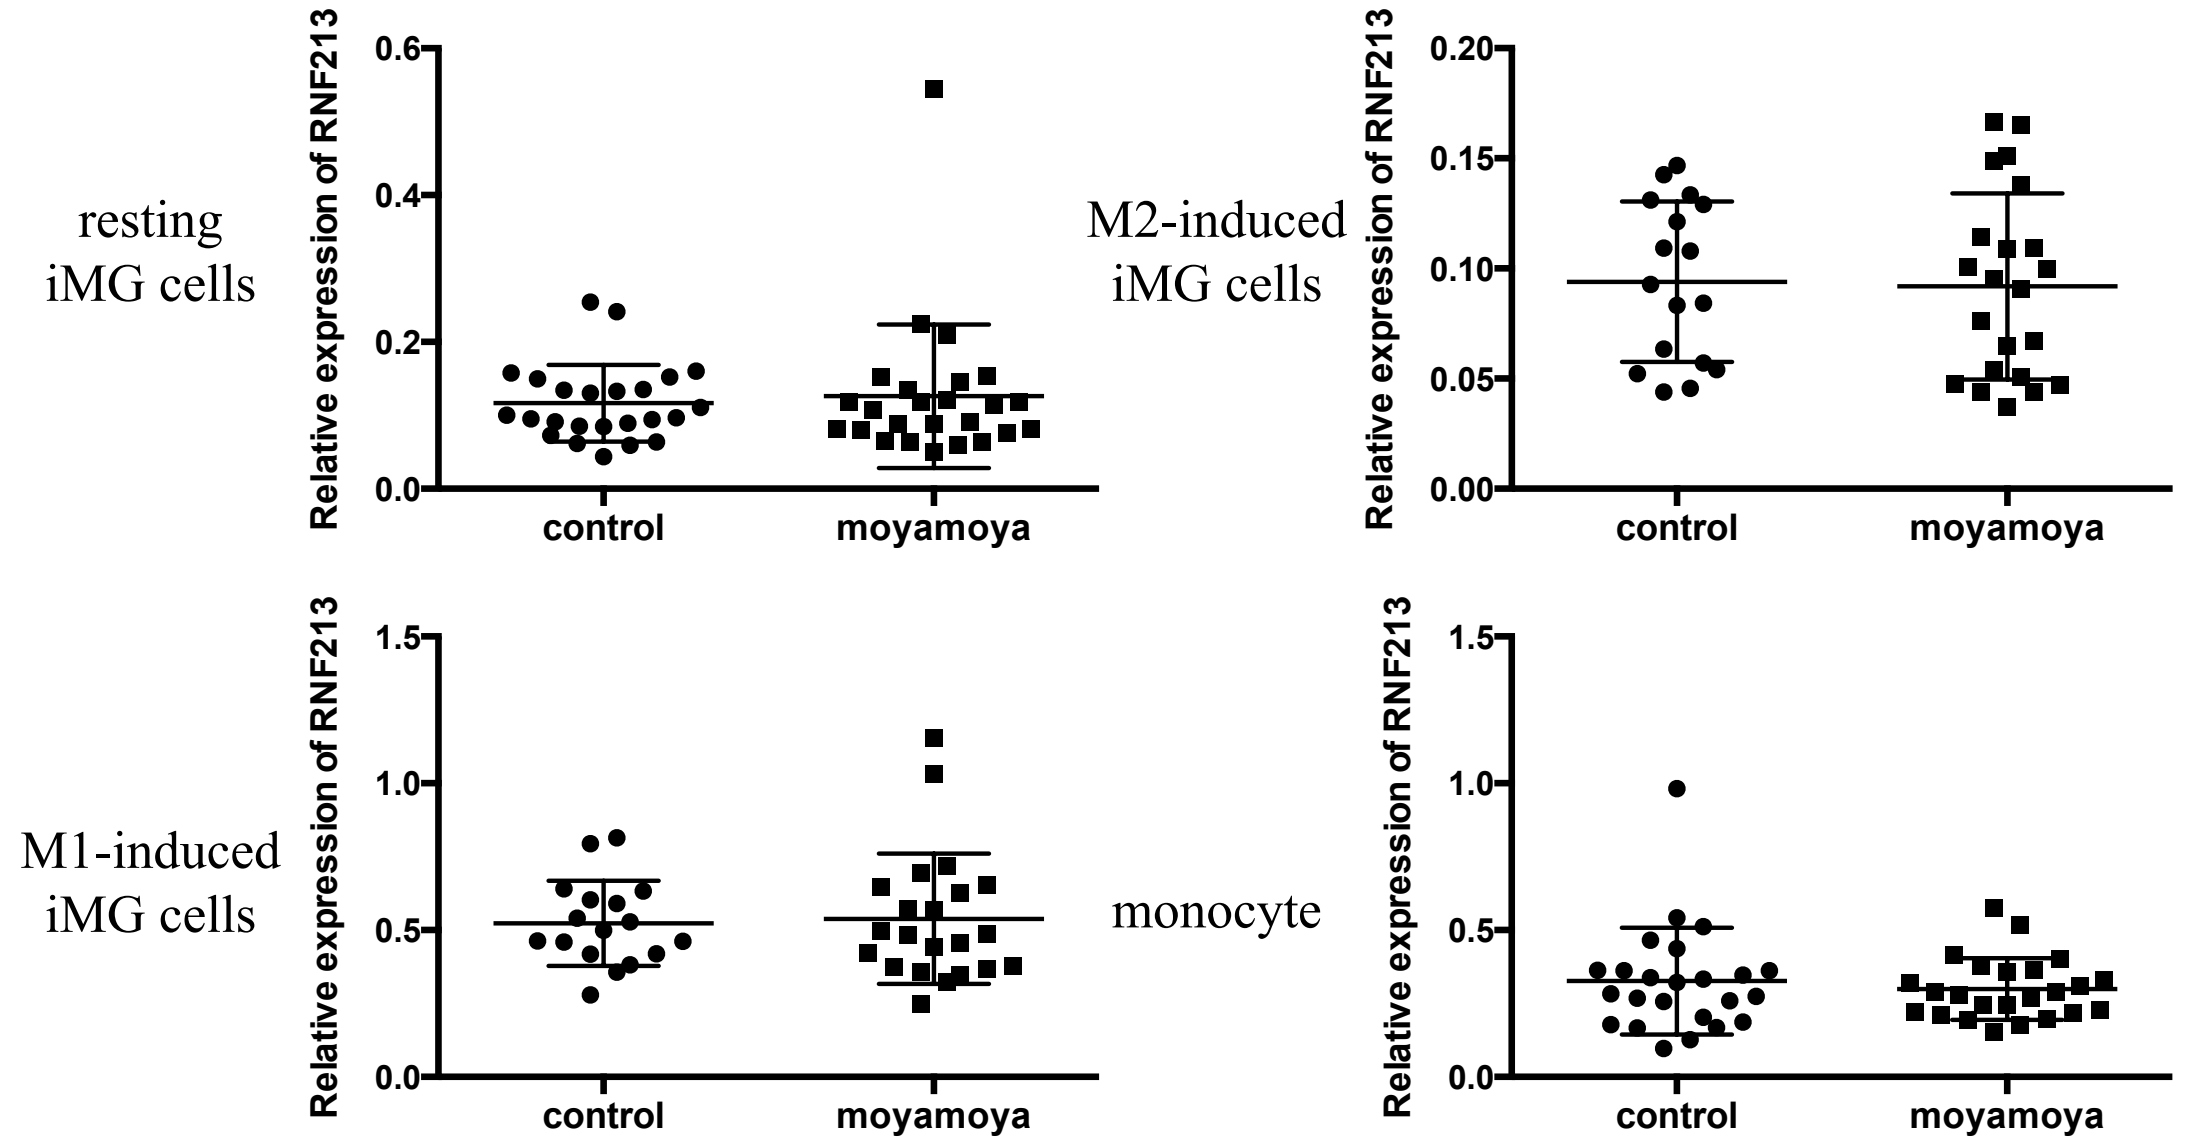

**Figure S2**

*MMP9*

*VEGFA*

*TGFB1*

qPCR

resting  
iMG cells

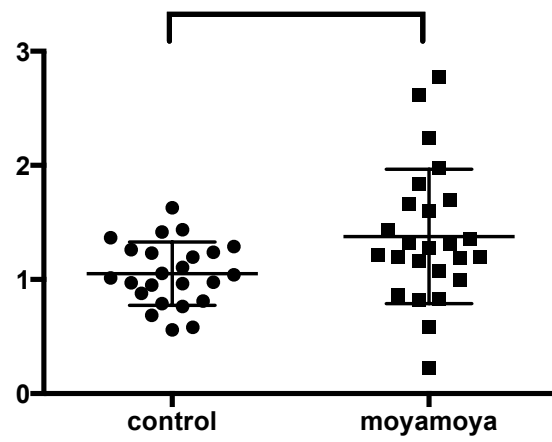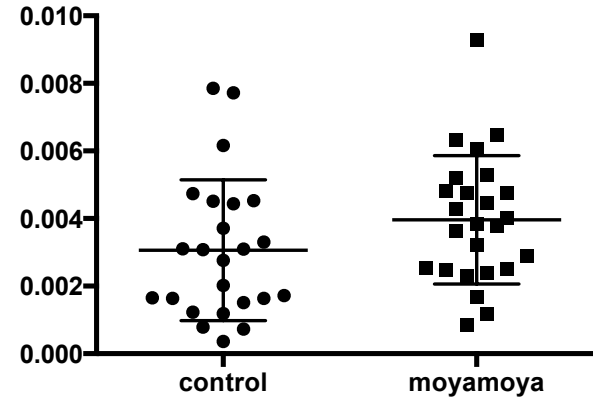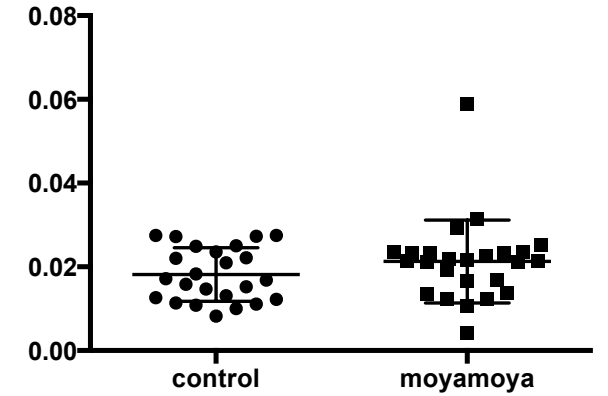

M1-induced  
iMG cells

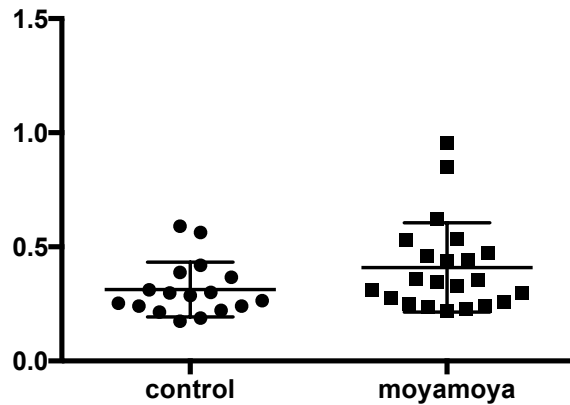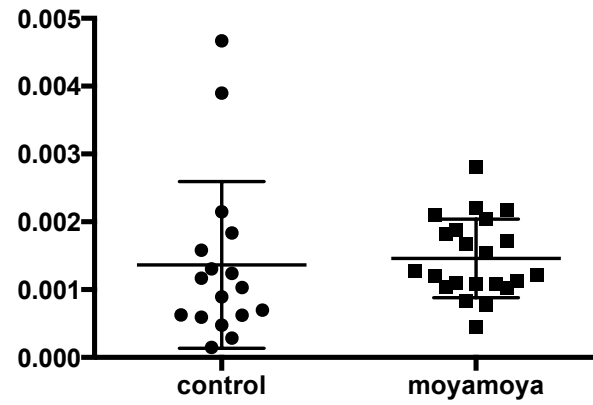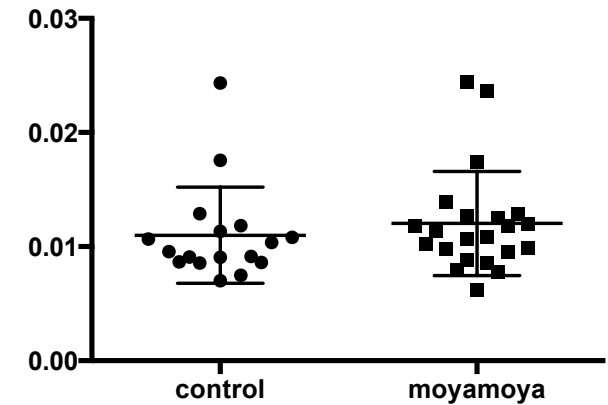

monocyte

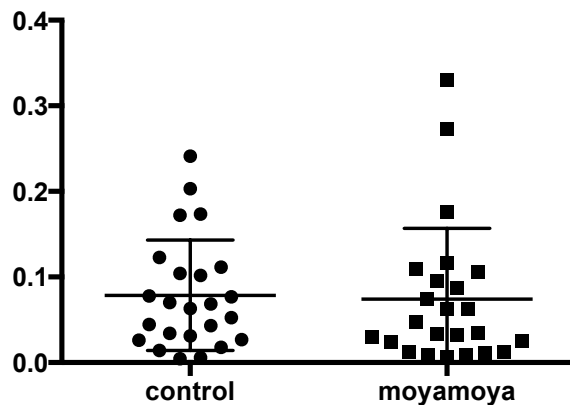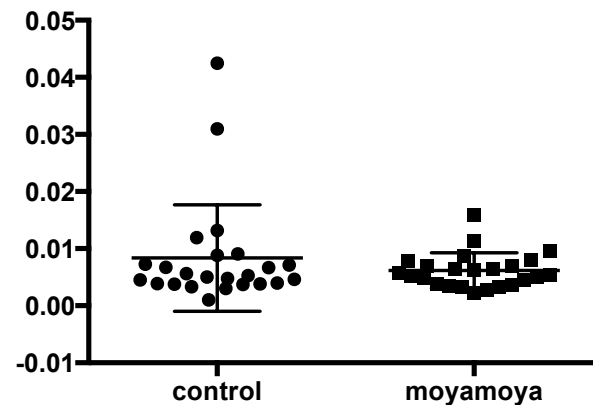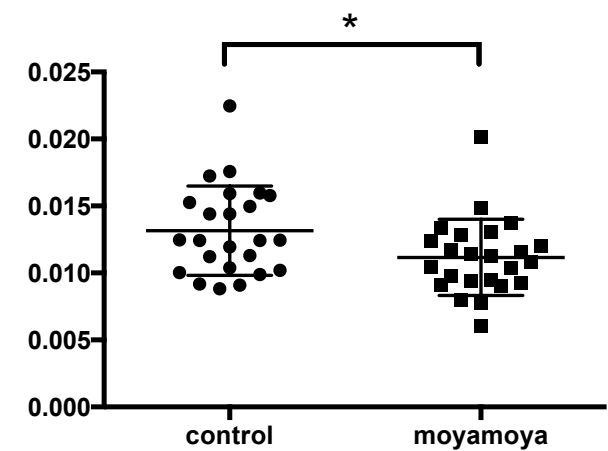

**Figure S3**

qPCR

*MMP9*

*VEGFA*

*TGFB1*

resting  
iMG cells

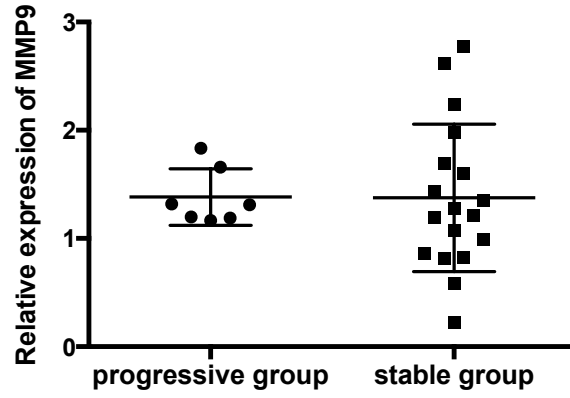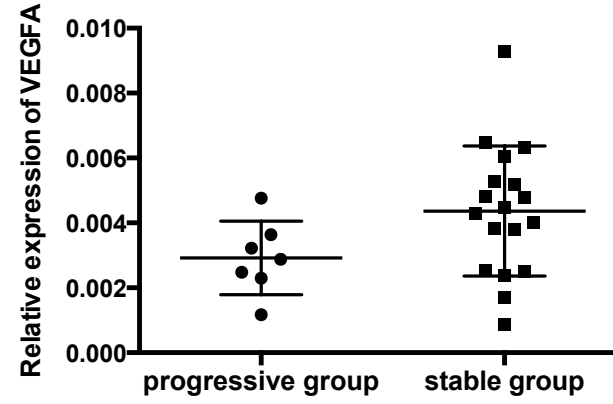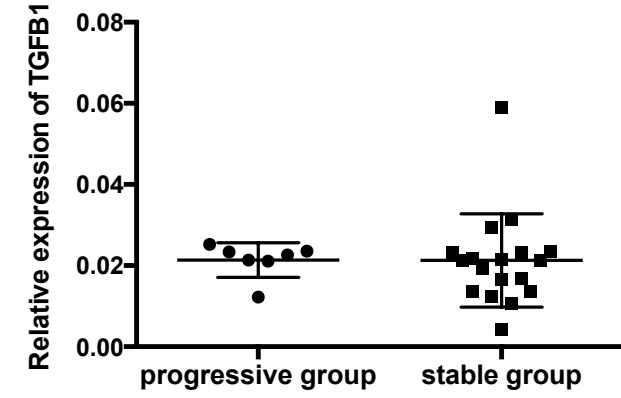

M1-induced  
iMG cells

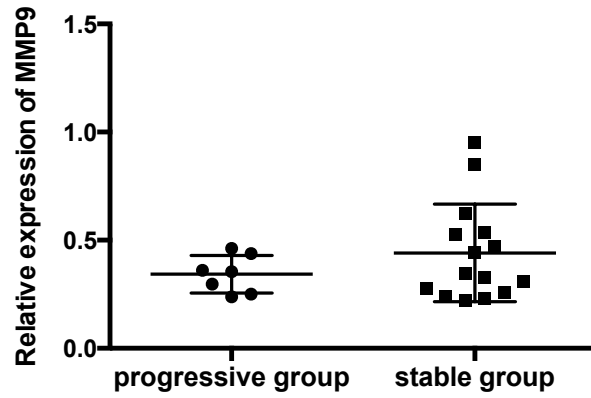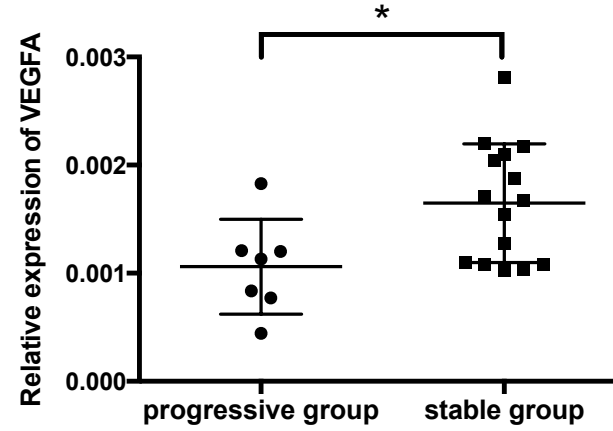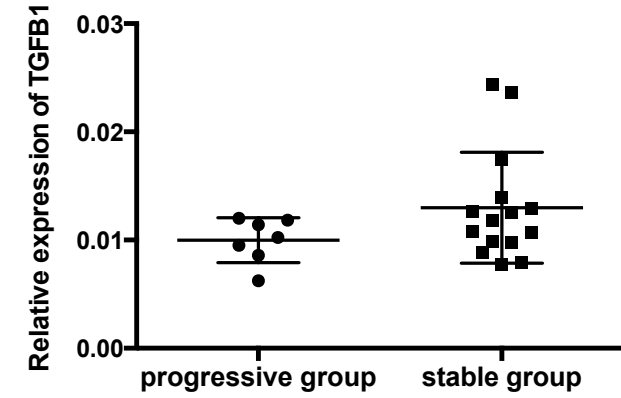

monocyte

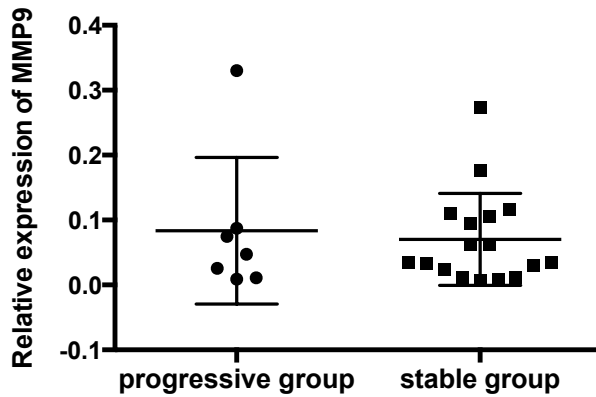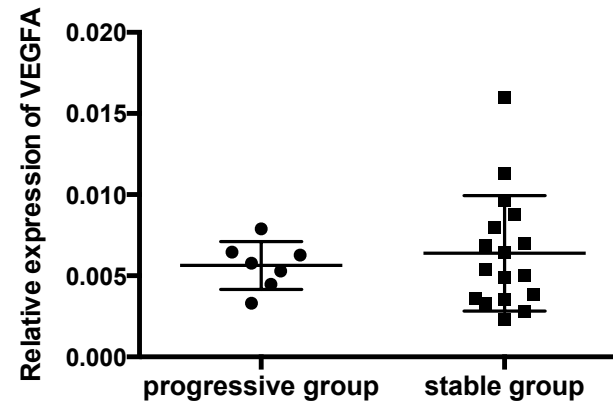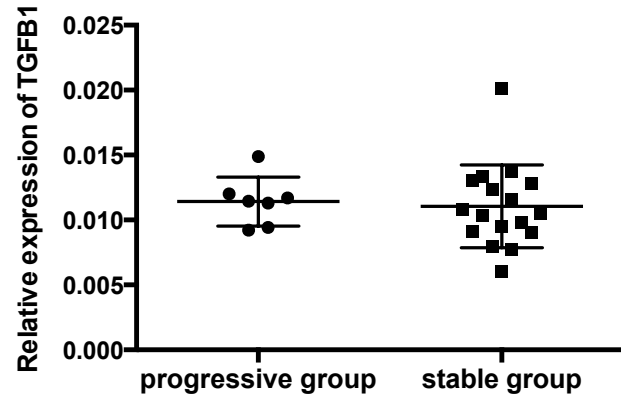

Supplement: 41598_2023_41456_MOESM1_ESM.pdf [file 41598_2023_41456_MOESM1_ESM.pdf]
